# Supplementary material
Source: publisher figshare collection journal article supplement (https://acs.figshare.com/ndownloader/files/24889013)
Supplement: Supplementary file 1 [file 24889013]

---

## Supporting Information

# Anisotropic Triboelectric Nanogenerator Based on Ordered Electrospinning

Ning Wang<sup>a,1</sup>, Xiao-Xiong Wang<sup>a,1</sup>, Kang Yan<sup>a</sup>, Weizhi Song<sup>a</sup>,  
Zhiyong Fan<sup>b</sup>, Miao Yu<sup>a,c</sup>, and Yun-Ze Long<sup>a,d,\*</sup>

<sup>a</sup> *Collaborative Innovation Center for Nanomaterials & Devices, College of Physics,  
Qingdao University, Qingdao 266071, China*

<sup>b</sup> *Department of Electronic & Computer Engineering, The Hong Kong University of  
Science & Technology, Kowloon, Hong Kong, China*

<sup>c</sup> *Junada (Qingdao) Technology Co., Ltd, Qingdao International Academician Park,  
Qingdao 266199, China*

<sup>d</sup> *Collaborative Innovation Center for Eco-Textiles of Shandong Province, Qingdao  
University, Qingdao 266071, China*

---

\* Corresponding author

E-mail address: yunze.long@qdu.edu.cn or yunze.long@163.com

<sup>1</sup> These two authors contributed equally to this work.

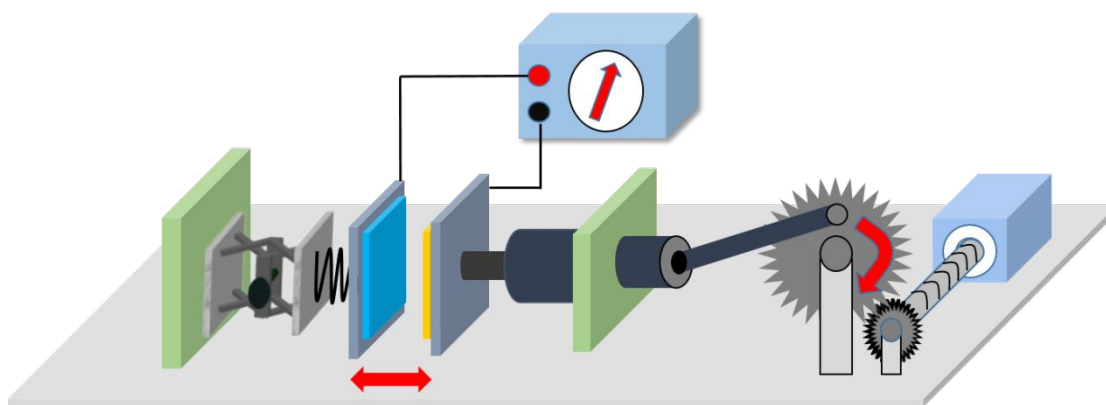

**Fig. S1.** Schematic diagram of the TENG test set.

Fig. S1 shows the basic equipment for friction nanogenerator to achieve periodic friction. Fix the two friction materials on the lifting platform and the reciprocating device. The motor drives the reciprocating device, which enables repeated contact and separation between the friction materials.

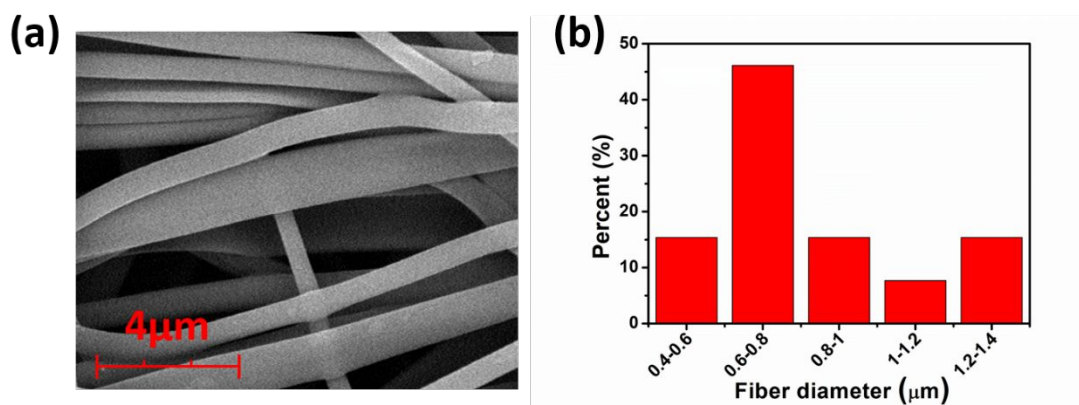

**Fig. S2.** (a) SEM image and (b) diameter distribution of the electrospun PA6 nanofibers spun by electrospinning when the drum's rotating speed is 4000 rpm.

---

| Direction<br>Thickness<br>(mm) | Transverse<br>direction ( // ) | Longitudinal<br>direction ( ⊥ ) |
|--------------------------------|--------------------------------|---------------------------------|
| 0 rpm                          | 0.085                          | 0.089                           |
| 4000 rpm                       | 0.073                          | 0.113                           |

**Fig. S3.** Thickness of the sample subjected to the tensile test.

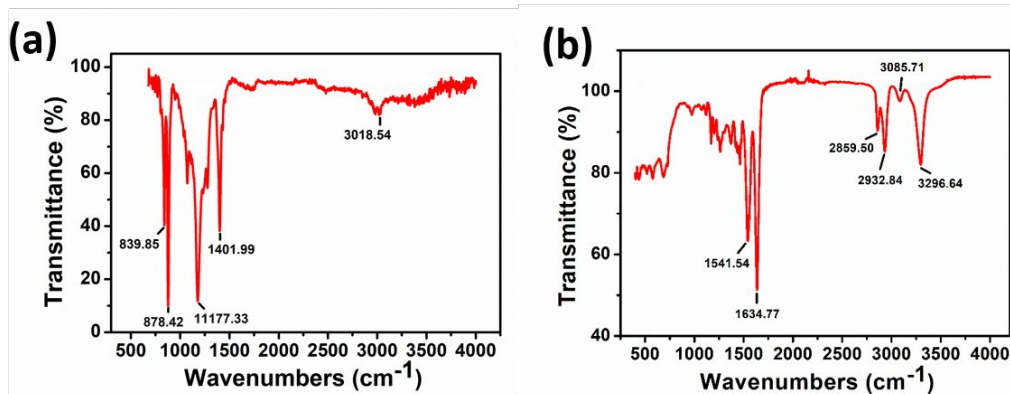

**Fig. S4.** (a) The FTIR of PVDF fiber membranes. (b) The FTIR of PA6 fiber membranes.

Fig. S4a shows the FTIR spectrum of PVDF, the CH stretching vibration peak at  $3018.54\text{ cm}^{-1}$ ; the deformation rocking vibration peak of CH<sub>2</sub> at  $1401.99\text{ cm}^{-1}$ ; the CF<sub>2</sub> stretching vibration peak at  $11177.33\text{ cm}^{-1}$ ;  $878.42\text{ cm}^{-1}$  is the C-C skeleton vibration peak; the sharp absorption at  $839.85\text{ cm}^{-1}$  is the vibration absorption peak of the crystal phase. From the FTIR spectrum (Fig. S4b), we can obtain the chemical structure of PA6, for example, the absorption peak of amide I at  $1634.77\text{ cm}^{-1}$ , the absorption peak of amide II at  $1541.54\text{ cm}^{-1}$ , and the absorption peak of amine at  $3296.64\text{ cm}^{-1}$ . There are absorption peaks of methylene at  $3085.71$ ,  $2932.84$ , and  $2859.50\text{ cm}^{-1}$ .

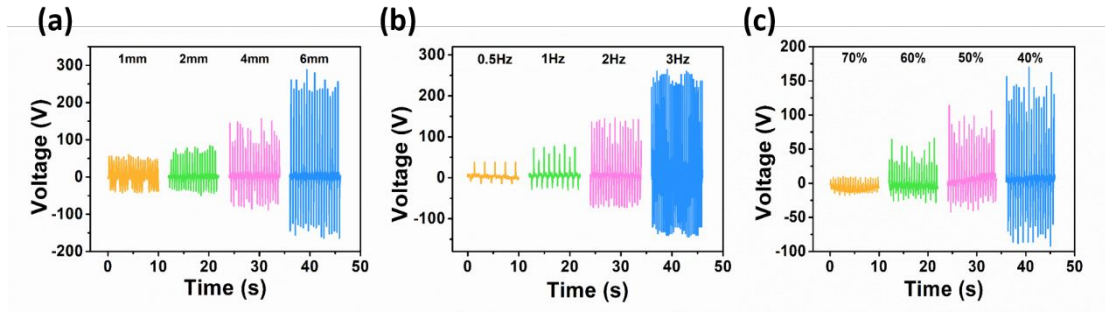

**Fig. S5.** The open circuit voltage of TENG under different (a) separation distance between triboelectric layers, (b) impact frequency, (c) ambient humidity.

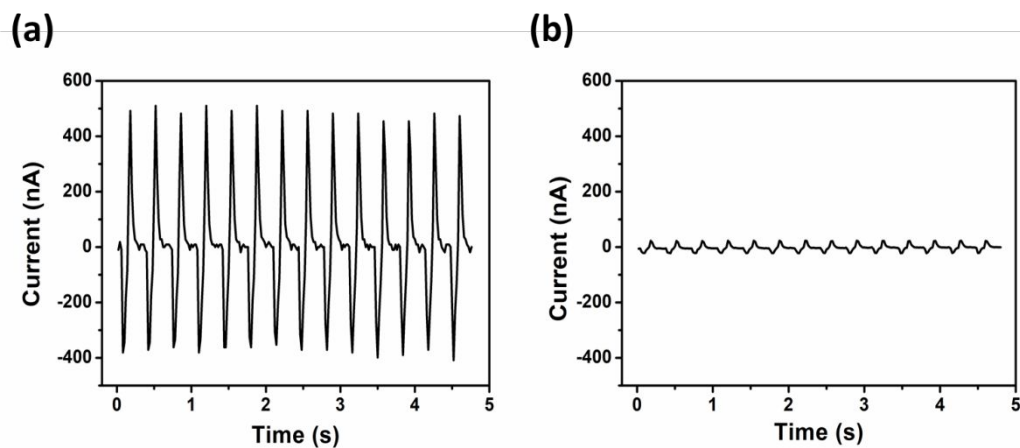

**Fig. S6.** Current output of the embedded A-TENG. (a) The normal state of the A-TENG. (b) The locked state of the A-TENG, in which the electrodes were placed vertically.
